# Supplementary material
Source: PubMed Central journal article supplement (PMC3877727)
Supplement: NIHMS535046-supplement-01.pdf [file NIHMS535046-supplement-01.pdf]

## SUPPLEMENTARY TABLES

**Table S1.** *n*-back task performance for lure stimuli by genotype group

|                         | COMT<br>Val/Val<br>D-32 C<br>( <i>n</i> = 15) | COMT<br>Val/Met<br>D-32 C<br>( <i>n</i> = 20) | COMT<br>Met/Met<br>D-32 C<br>( <i>n</i> = 9) | COMT<br>Val/Val<br>D-32 T/T<br>( <i>n</i> =14) | COMT<br>Val/Met<br>D-32 T/T<br>( <i>n</i> =23) | COMT<br>Met/Met<br>D-32 T/T<br>( <i>n</i> =16) |
|-------------------------|-----------------------------------------------|-----------------------------------------------|----------------------------------------------|------------------------------------------------|------------------------------------------------|------------------------------------------------|
| Lure Accuracy<br>(%)    |                                               |                                               |                                              |                                                |                                                |                                                |
| 2-back                  | 70.3 ± 4.8                                    | 79.8 ± 4.0                                    | 64.8 ± 5.9                                   | 73.1 ± 4.9                                     | 80.8 ± 3.8                                     | 74.5 ± 4.5                                     |
| 3-back                  | 60.1 ± 4.5                                    | 62.0 ± 3.8                                    | 69.4 ± 5.6                                   | 66.2 ± 4.6                                     | 62.8 ± 3.5                                     | 63.4 ± 4.2                                     |
| Lure Correct RT<br>(ms) |                                               |                                               |                                              |                                                |                                                |                                                |
| 2-back                  | 788.8 ± 39.2                                  | 795.5 ± 33.0                                  | 821.6 ± 48.4                                 | 809.0 ± 39.5                                   | 839.2 ± 30.8                                   | 898.7 ± 36.6                                   |
| 3-back                  | 740.7 ± 48.7                                  | 807.6 ± 40.9                                  | 758.3 ± 60.1                                 | 762.4 ± 49.1                                   | 766.7 ± 38.2                                   | 799.7 ± 45.4                                   |

**Table S1:** Values are reported as mean  $\pm$  SEM. Reported  $p$ -values reflect interaction effects from 3 $\times$ 2 ANOVA with sex and white ethnicity included as covariates. Exact  $p$ -values reported unless  $p < 0.001$ .
